# Supplementary material for: HIF1α Integrates Lipogenic FASN and Glycolytic GLUT3 to Overcome intratumor Oxidative and Hypoxic Stress for Colorectal Cancer Metastasis
Source: Research Square preprint supplement (doi:10.21203/rs.3.rs-5868429/v1), 2025-02-05
Supplement: Supplementary file [file 9b62a0414e9f59fc084e045b.pdf]

## Supplemental Figures

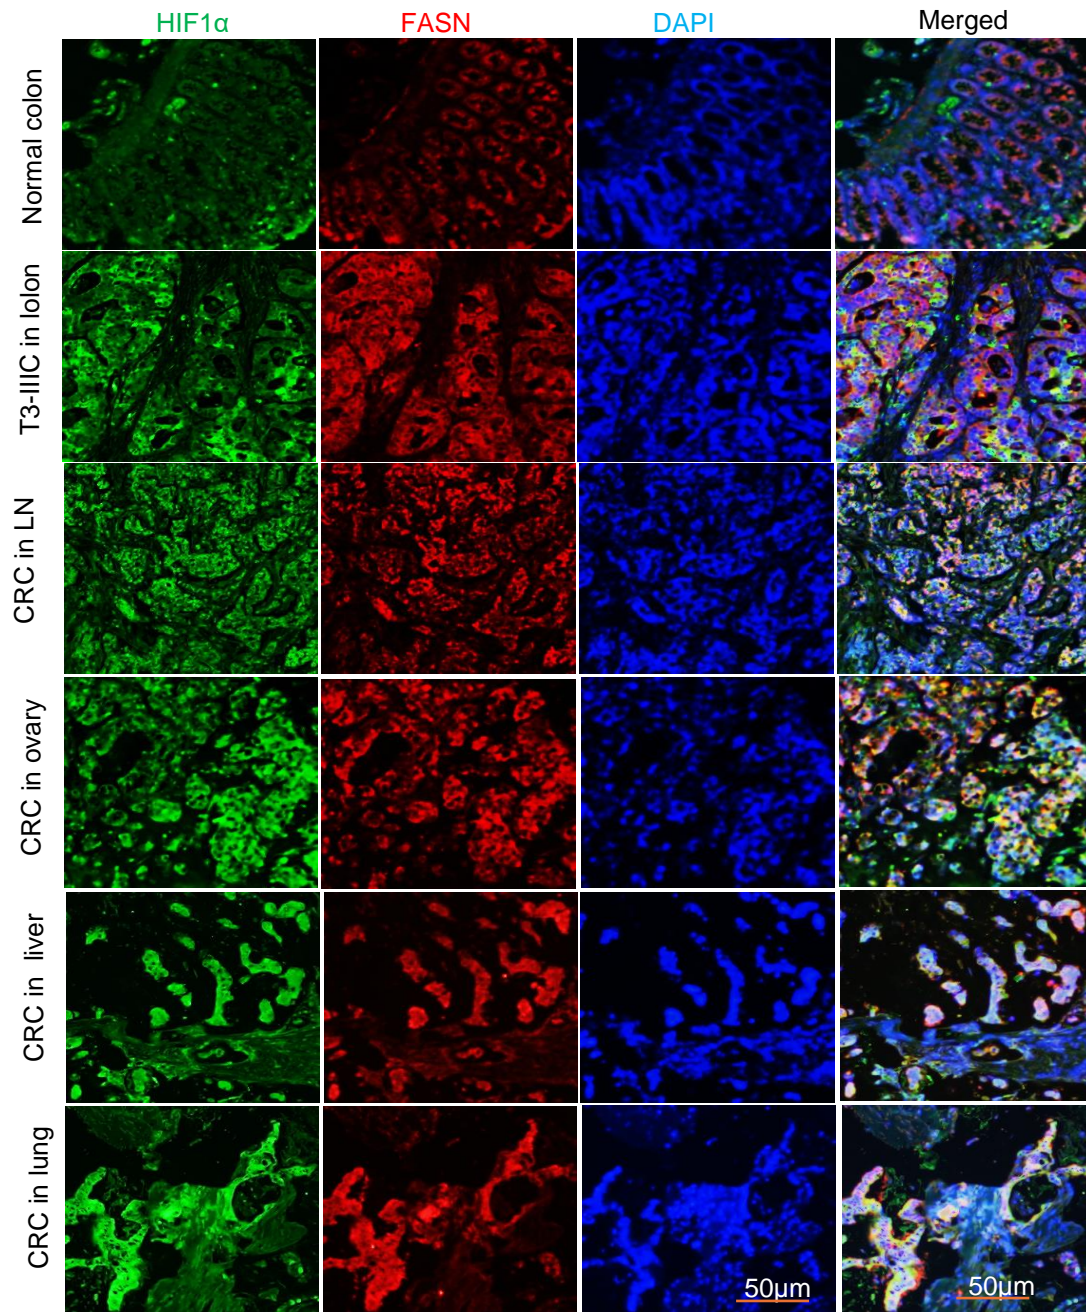

**Fig.S1 Co-expression of HIF1α and FASN in metastatic CRC tissues.**

Tissue microarray slide was stained with primary antibodies of HIF1α and FASN, then Alexa Fluor-conjugated secondary antibodies after washing.

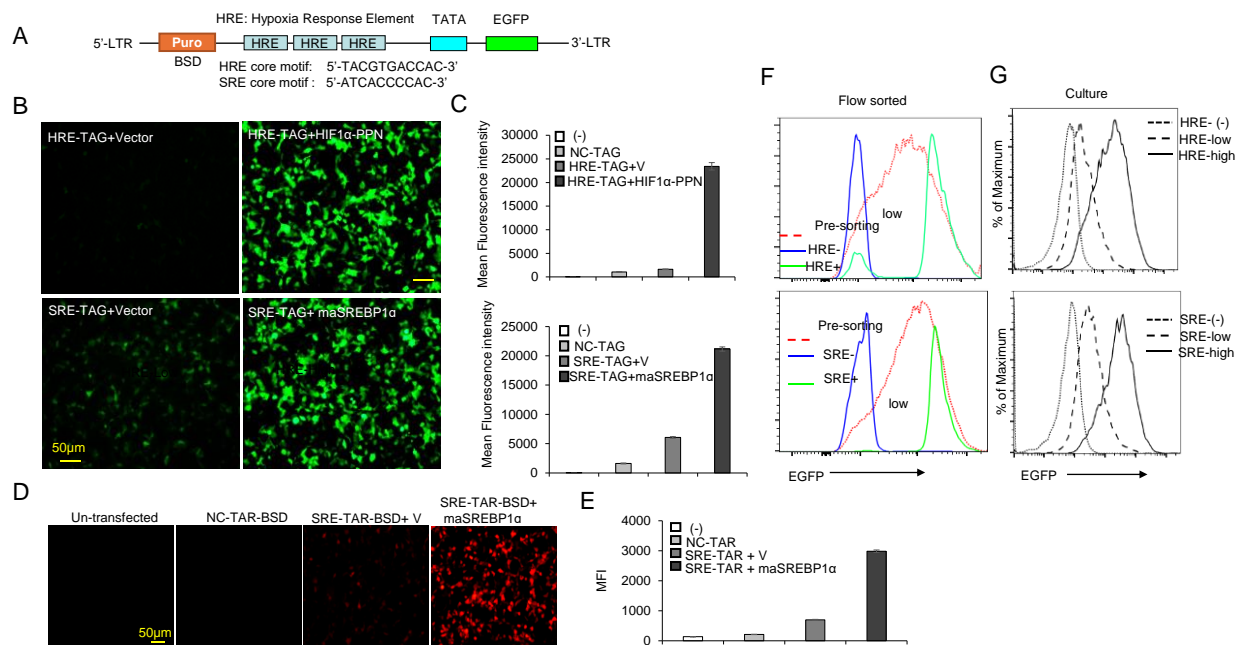

**Fig.S2 Reporter specificity and FACS results of HRE and SRE.** **A.** Map for HRE and SRE reporters. **B-F.** HEK293FT cells were transiently transfected with these reporters and cDNA plasmids as indicated for 32 hours (B,C) or 16 hours (D,F) before taking pictures and quantitation by flowcytometry. **G,H.** HCT116 cells were transduced lentivirus of HRE or SRE reporter to get puromycin-resistant stable cells before performing fluorescence-activated cell sorting (FACS) and culture of sorted cells.
